# Supplementary material for: Identification of a novel hypermethylation marker, ZSCAN18, and construction of a diagnostic model in cervical cancer
Source: Research Square preprint supplement (doi:10.21203/rs.3.rs-3174369/v1), 2023-07-26
Supplement: Supplementary file 1 [file 2747da127109e1490a5d5bc8.xlsx]

## Sheet: Sheet1
Suppl.Table 3 Detection performance of six diagnostic models in the mock test cohort
Model	Sensitivity	Specificity	ROCAUC（95%CI）	Accuracy	Precision	Kappa	F1 score
LR	0.7778	0.9	0.8389 (0.6647-1.0000)	0.8421	0.875	0.6816	0.8235
SVM	1	0.9	0.9500 (0.8520-1.0000)	0.9474	0.9	0.895	0.9474
RF	1	0.8	0.9000 (0.7693-1.0000)	0.8947	0.8182	0.7912	0.9
NN	1	0.8	0.9000 (0.7693-1.0000)	0.8947	0.8182	0.7912	0.9
LASSO	1	0.9	0.9778 (0.9256-1.0000)	0.9474	0.9	0.895	0.9474
RR	1	1	1.0000 (1.0000-1.0000)	1	1	1	1
