# Supplementary material for: Identification of a novel hypermethylation marker, ZSCAN18, and construction of a diagnostic model in cervical cancer
Source: Research Square preprint supplement (doi:10.21203/rs.3.rs-3174369/v1), 2023-07-26
Supplement: Supplementary file 2 [file 3f40f6297185e0971166994a.xlsx]

## Sheet: Sheet1
Suppl.Table 2 Detection performance of six diagnostic models in the validation cohort
Model	Sensitivity	Specificity	ROCAUC（95%CI）	Accuracy	Precision	Kappa	F1 score
LR	0.8586	0.9455	0.9020 (0.8730-0.9310)	0.8816	0.9775	0.7261	0.9142
SVM	0.9013	0.9545	0.9279 (0.9022-0.9537)	0.9155	0.9821	0.798	0.94
RF	0.8849	0.9455	0.9152 (0.8873-0.9430)	0.901	0.9782	0.7659	0.9292
NN	0.8947	0.8727	0.8837 (0.8480-0.9195)	0.8889	0.951	0.7294	0.922
LASSO	0.8717	0.9455	0.9249 (0.8972-0.9525)	0.8913	0.9779	0.7458	0.9217
RR	0.898	0.9455	0.9421 (0.9188-0.9654)	0.9106	0.9785	0.7864	0.9365
