# Supplementary material for: Identification of a novel hypermethylation marker, ZSCAN18, and construction of a diagnostic model in cervical cancer
Source: Research Square preprint supplement (doi:10.21203/rs.3.rs-3174369/v1), 2023-07-26
Supplement: Supplementary file 3 [file 9d0d95dcba2f4a27a762562f.xlsx]

## Sheet: Sheet1
Suppl.Table 5 Gene expression datasets from GEO
GSE ID	platform	cancer			normal
		squamous	adenocarcinoma	adenosquamous		total	total
GSE7803	GPL96 (HG-U133A] Affymetrix Human Genome U133A Array	21	0	0		21	10
GSE9750	GPL96 (HG-U133A] Affymetrix Human Genome U133A Array	32	1	0		33	24
GSE6791	GPL570 (HG-U133_Plus_2] Affymetrix Human Genome U133 Plus 2.0 Array	20	0	0		20	8
GSE63514	GPL570 (HG-U133_Plus_2] Affymetrix Human Genome U133 Plus 2.0 Array	28	0	0		28	24
