# Supplementary material for: Identification of a novel hypermethylation marker, ZSCAN18, and construction of a diagnostic model in cervical cancer
Source: Research Square preprint supplement (doi:10.21203/rs.3.rs-3174369/v1), 2023-07-26
Supplement: Supplementary file 4 [file b0db03557c0522f711d633dd.xlsx]

## Sheet: Sheet1
Suppl.Table 4 DNA methylation datasets from GEO
GSE ID	platform	cancer				normal
		squamous	adenocarcinoma	adenosquamous	total	total
GSE46306	GPL13534 Illumina HumanMethylation450 BeadChip	6	0	0	6	20
GSE68339	GPL13534 Illumina HumanMethylation450 BeadChip	149	0	0	149	0
(cohort 1)
GSE68339	GPL13534 Illumina HumanMethylation450 BeadChip	124	0	0	121	0
(cohort 2)
GSE99511	GPL13534 Illumina HumanMethylation450 BeadChip	4	0	0	4	28
GSE134772	GPL23976 Illumina Infinium HumanMethylation850 BeadChip	3	0	0	3	3
GSE169622	GPL21145 Infinium Methylation EPIC	NA	NA	NA	6	3
