# Supplementary material for: Identification of a novel hypermethylation marker, ZSCAN18, and construction of a diagnostic model in cervical cancer
Source: Research Square preprint supplement (doi:10.21203/rs.3.rs-3174369/v1), 2023-07-26
Supplement: Supplementary file 5 [file bcdaa376600f0afd96f8bca6.xlsx]

## Sheet: Sheet1
Suppl.Table 6 Primers
	Primer or Pobe	Sequence (5’ to 3')	product siz (bp)
MSP	ZSCAN18-MF	GGTGTTTAAAATGACGTAGGC	104
/QMSP	ZSCAN18-MR	CGAACAAAAAAACCGTAACA
	ZSCAN18-UF	TATGGTGTTTAAAATGATGTAGGT	110
	ZSCAN18-UR	AAACAAACAAAAAAACCATAACA
	ACTB-MR	TGGTGATGGAGGAGGTTTAGTAAGT	133
	ACTB-MF	AACCAATAAAACCTACTCCTCCCTTAA
QMSP	ZSCAN18 porbe	5`6-FAM-ACGTCGGGAGGTTAT
probe		ATTCGCGT-3`BHQ1
	ACTB probe	5`6-FAM-ACCACCACCCA
		ACACACAATAACAAACACA-3`BHQ1
Pyro-sequencing	ZSCAN18-pyro-F	TTTTGGTTGTTAGGGGTTTATTATT	399
	ZSCAN18-pyro-R	bio-ACCCTAACCCCTTTCCCTAA
	ZSCAN18-pyro-S	ATTTAGTTGTTATGGTGTTTAAAAT
qRT‒PCR	ZSCAN18-F	GTGTACGAGAGGCACATGGA	109
	ZSCAN18-R	AAAGCCAGGGTGTCTCAGAA
	GAPDH-F	CAGATTCGGGCTTTTACTGC	120
	GAPDH-R	AGCCAAAGACCATGAACACC
