# Supplementary material for: Identification of a novel hypermethylation marker, ZSCAN18, and construction of a diagnostic model in cervical cancer
Source: Research Square preprint supplement (doi:10.21203/rs.3.rs-3174369/v1), 2023-07-26
Supplement: Supplementary file 6 [file dbcc9e6aa66699d663025f04.xlsx]

## Sheet: Sheet1
		Suppl.Table 1 Methylation levels of the CpG site of the ZSCAN18 promoter fragment in cervical tissue determined by pyrosequencing
		CpG site/group	1	2	3	4	5	6	7	8	9	Sample mean methylation level
		IV	93	93	86	74	81	85	100	86	79	86.56
		leu	4	4	4	3	4	6	5	3	14	5.22
		Cancer	53	47.4	58	41.4	40	44.8	38.8	29.8	44.4	44.18±7.27
		normal	4.2	4.6	23.2	5	4.8	5	6	4.4	19.4	8.51±9.30
		difference	48.8	42.8	34.8	36.4	35.2	39.8	32.8	25.4	25	35.66±5.186
